# Supplementary material for: The Multidisciplinary Swallowing Team Approach Decreases Pneumonia Onset in Acute Stroke Patients
Source: PubMed Central journal article supplement (PMC4854465; doi:10.1371/journal.pone.0154608), 2016-05-03
Supplement: pone.0154608.s001.pdf [file pone.0154608.s001.pdf]

## **S1: Hiroshima University Hospital Stroke Swallowing Team**

### **Doctors**

Shiro Aoki, Mutsuko Araki, Eisuke Dohi, Hiroki Fujii, Shotaro Haji, Naohisa Hosomi,

Naoto Kinoshita, Juri Kitamura, Megumi Kobayashi, Michihiro Kono, Tomoyuki Kono,

Tepei Kotozaki, Satoshi Kubo, Yuta Maetani, Hirofumi Maruyama, Masayasu

Matsumoto, Hayato Matsushima, Yoshito Nagano, Hiroyuki Naito, Masahiro Nakamori,

Takeshi Nakamura, Tomohisa Nezu, Nishikawa Tomokazu, Kazuhide Ochi, Yoko Ota,

Yukari Shinozaki, Takeo Shishido, Tomohisa Sugiura, Hiroki Ueno, Takeshi Yoshimoto,

Yuu Yamazaki

### **Dentists**

Chiaki Higa, Aya Hiraoka, Takahiro Mori, Hiromi Nishi, Mineka Yoshikawa

### **Nurses**

Ayame Abe, Hiroko Amano, Ayako Azechi, Ayaka Fukumoto, Kotomi Hamada,

Natsuyo Hamasaki, Miu Higawa, Junko Hirayama, Mina Ishihara, Kozue Kagotani,

Saya Kamikawa, Shingo Kishita, Makiko Kiyohara, Kiyomi Kobayashi, Mika Kogawa,

Keiko Madokoro, Masao Maeda, Miyuki Maeoki, Yoshiko Masuda, Yumi Matsuo,

Haruka Miyake, Rie Miyamoto, Teruyo Moriyama, , Yasuko Motoyama, Miki

Nishiyama, Kahori Nuruyu, Takashi Okada, Nanako Oyama, Masakazu Ryuji, Natsuko

Sako, Aya Sasaki, Tomomi Sasaki, Yoko Sato, Takae Seki, Haruka Shimizu, Yumi

Takahara, Megumi Tanaka, Miki Tanaka, Isamu Tominaga, Shouko Tomioka, Sayaka

Yamaichi, Hiromi Yamamoto, Kasumi Yanagihara

### **Physical therapists**

Yuichi Nishikawa, Naoya Orita, Noboru Shimada

### **Occupational therapists**

Naoya Yamane

### **Speech therapists**

Yuka Nagano, Mariko Ueasa, Akiko Yoshimura

**Managerial dieticians**

Kanako Amano, Akiko Nagao, Miyuki Oohata, Kazumi Shimada, Hiroko Tabuchi

**Dental hygienists**

Tomomi Okino, Megumi Takamoto, Kotomi Tetsumori
